# Supplementary material for: The Marine Polysaccharide Ulvan Confers Potent Osteoinductive Capacity to PCL-Based Scaffolds for Bone Tissue Engineering Applications
Source: Int J Mol Sci. 2021 Mar 17;22(6):3086. doi: 10.3390/ijms22063086 (PMC8002638; doi:10.3390/ijms22063086)
Supplement: Supplementary file 1 [file ijms-22-03086-s001.pdf]

# The Marine Polysaccharide Ulvan Confers Potent Osteoinductive Capacity to PCL-based Scaffolds for Bone Tissue Engineering Applications

Stefanos Kikionis <sup>1</sup>, Efstathia Ioannou <sup>1</sup>, Eleni Aggelidou <sup>2,3</sup>, Leto-Aikaterini Tziveleka <sup>1</sup>, Efterpi Demiri <sup>4</sup>, Athina Bakopoulou <sup>2,5</sup>, Spiros Zinelis <sup>6</sup>, Aristeidis Kritis <sup>2,3</sup> and Vassilios Roussis <sup>1,\*</sup>

<sup>1</sup> Section of Pharmacognosy and Chemistry of Natural Products, Department of Pharmacy, National and Kapodistrian University of Athens, Panepistimiopolis Zografou, Athens 15771, Greece; skikionis@pharm.uoa.gr (S.K.); eioannou@pharm.uoa.gr (E.I.); ltziveleka@pharm.uoa.gr (L.-A.T.)

<sup>2</sup> cGMP Regenerative Medicine Facility, Department of Physiology and Pharmacology, School of Medicine, Faculty of Health Sciences, Aristotle University of Thessaloniki, Thessaloniki 54124, Greece; angelide@auth.gr (E.A.); abakopoulou@dent.auth.gr (A.B.); kritis@auth.gr (A.K.)

<sup>3</sup> Department of Physiology and Pharmacology, School of Medicine, Faculty of Health Sciences, Aristotle University of Thessaloniki, Thessaloniki 54124, Greece

<sup>4</sup> Department of Plastic Surgery, School of Medicine, Faculty of Health Sciences, Papageorgiou Hospital, Aristotle University of Thessaloniki, Thessaloniki 54124, Greece; demirie@auth.gr (E.D.)

<sup>5</sup> Laboratory of Prosthodontics, School of Dentistry, Aristotle University of Thessaloniki, Thessaloniki 54124, Greece

<sup>6</sup> Department of Biomaterials, School of Dentistry, National and Kapodistrian University of Athens, Athens 11527, Greece; szinelis@dent.uoa.gr (S.Z.)

\* Correspondence: roussis@pharm.uoa.gr; Tel.: +30 210 727 4592

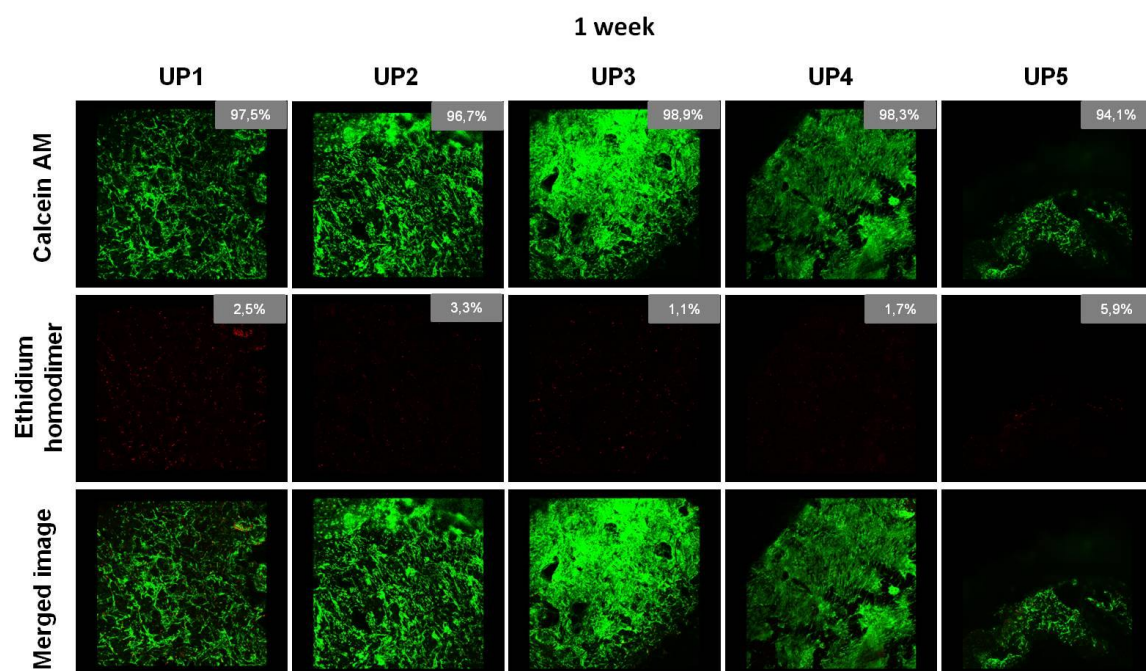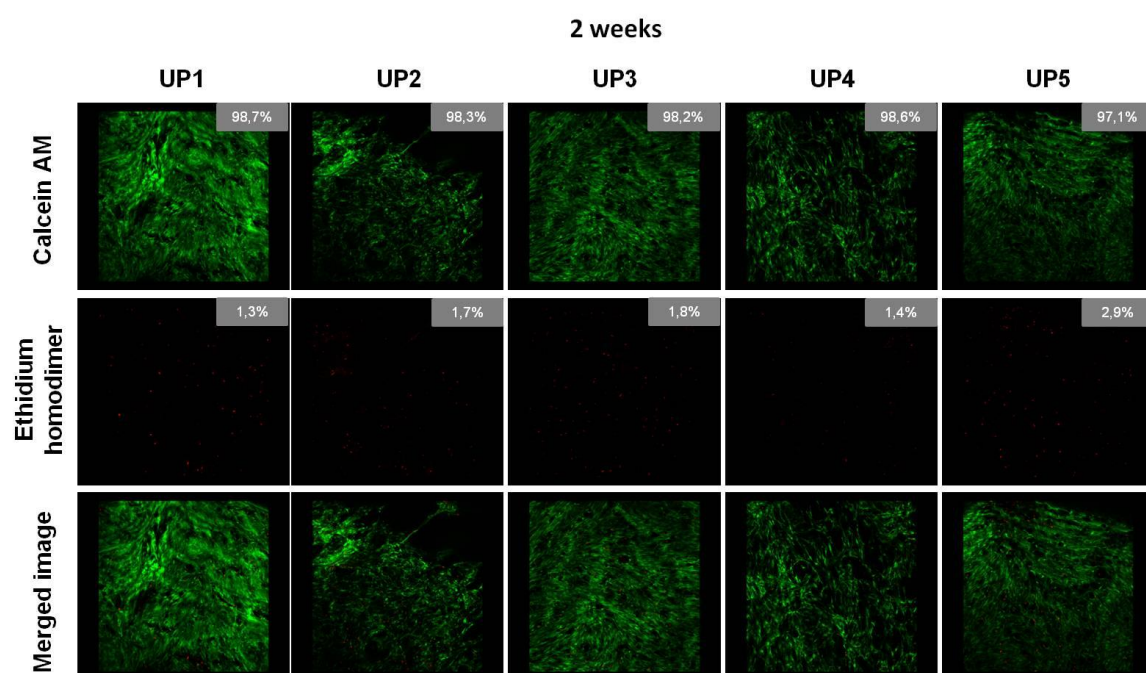

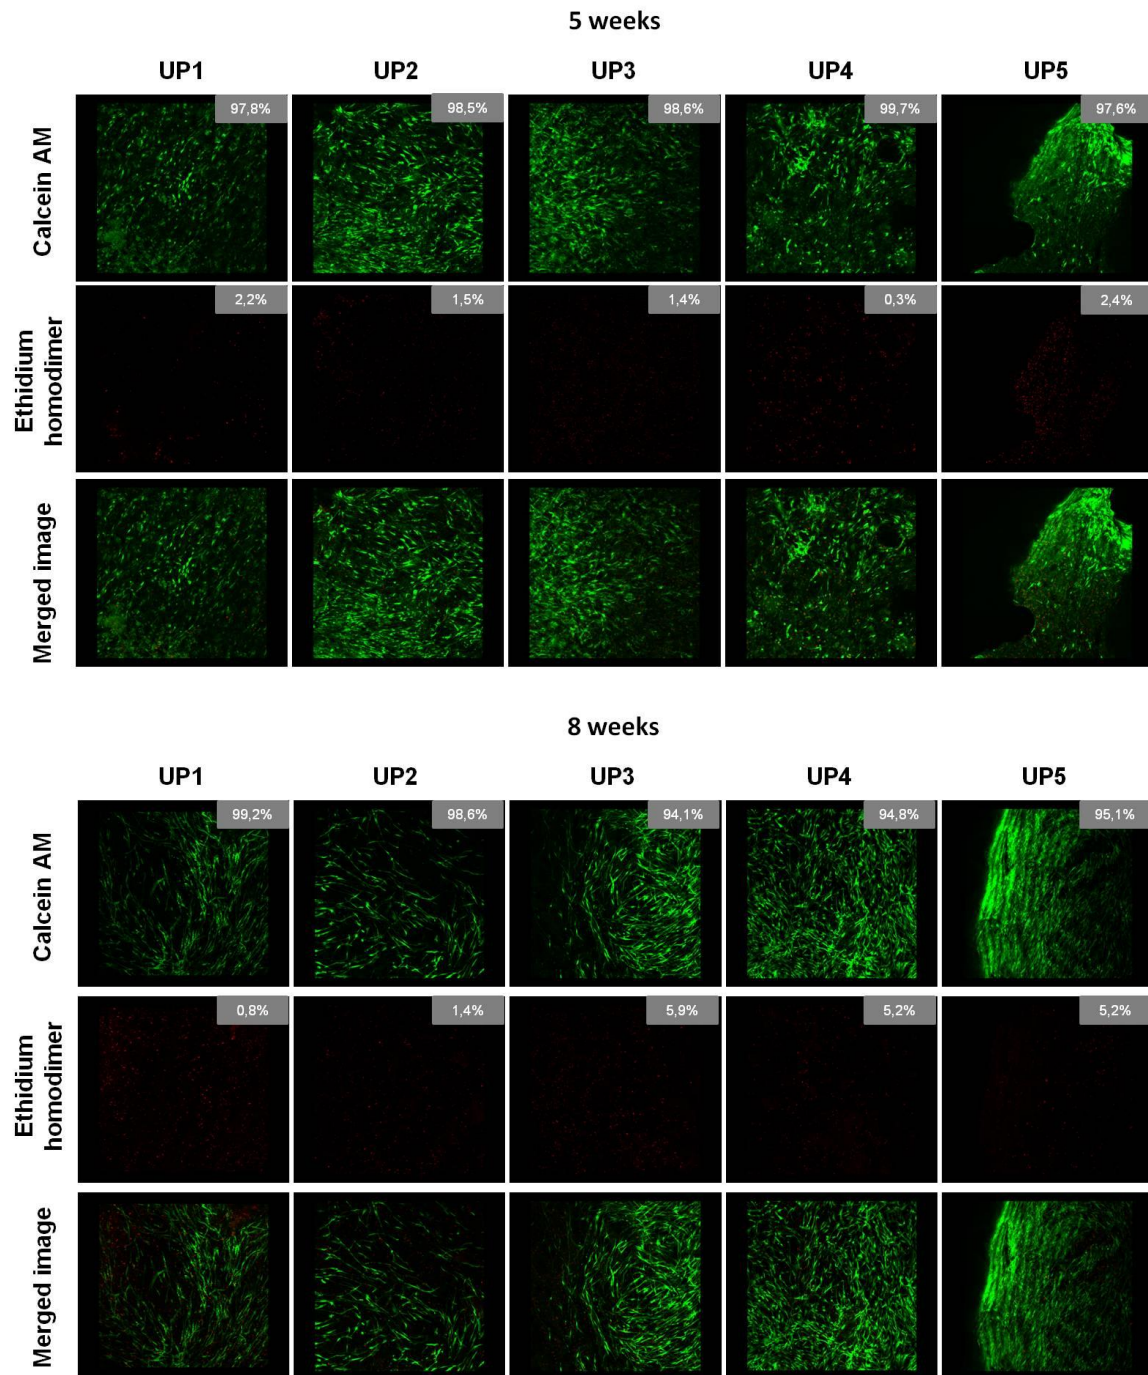

**Figure S1.** Confocal images of UP scaffolds seeded with hADMSCs. Live/dead staining with calceinAM/ethidium homodimer showing cell viability of hADMSCs after 1 week culture in MSC expansion medium and 2, 5 and 8 weeks culture in osteogenic differentiation medium. The relative cell viability or mortality (%) are denoted in the upper right part of the images.

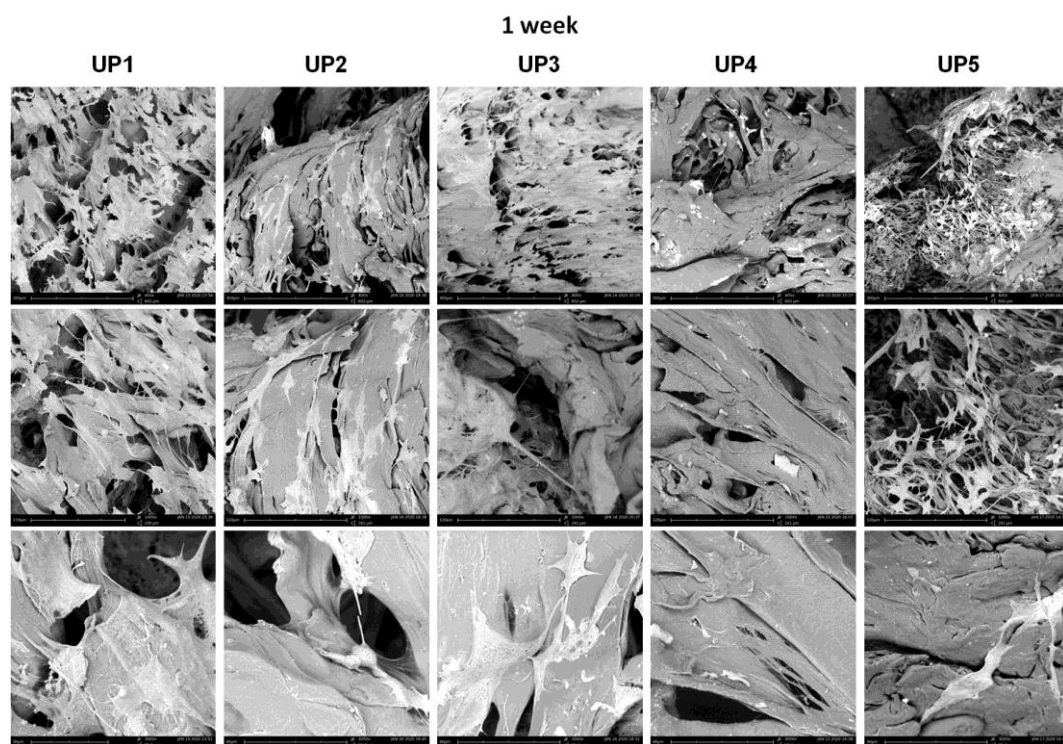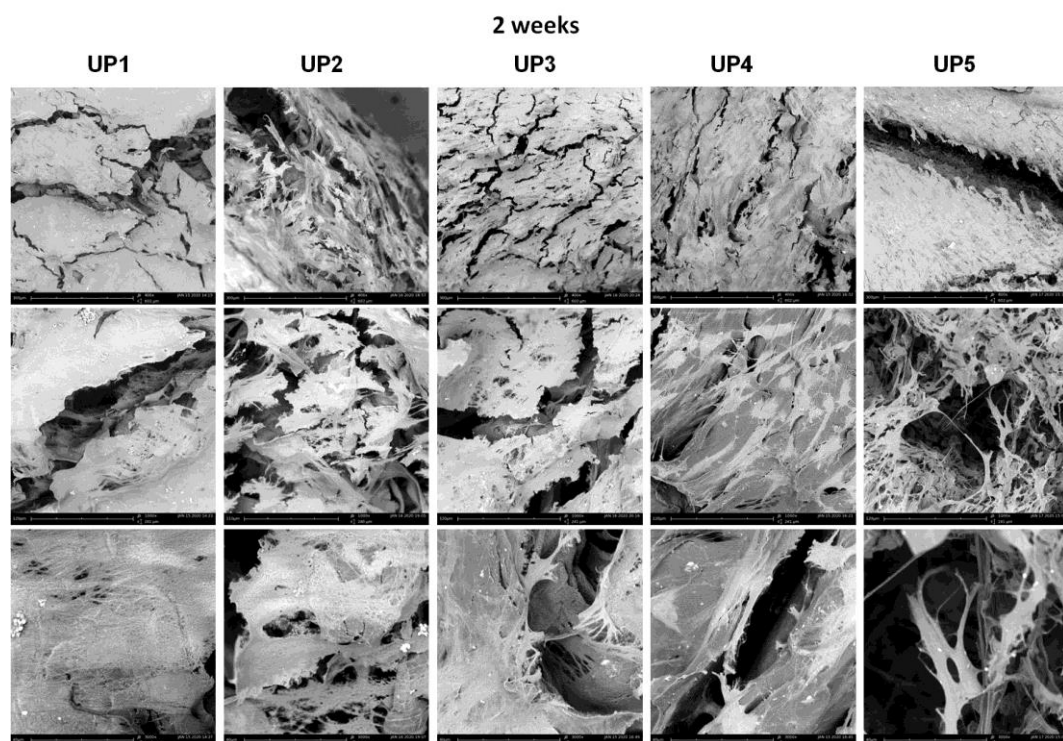

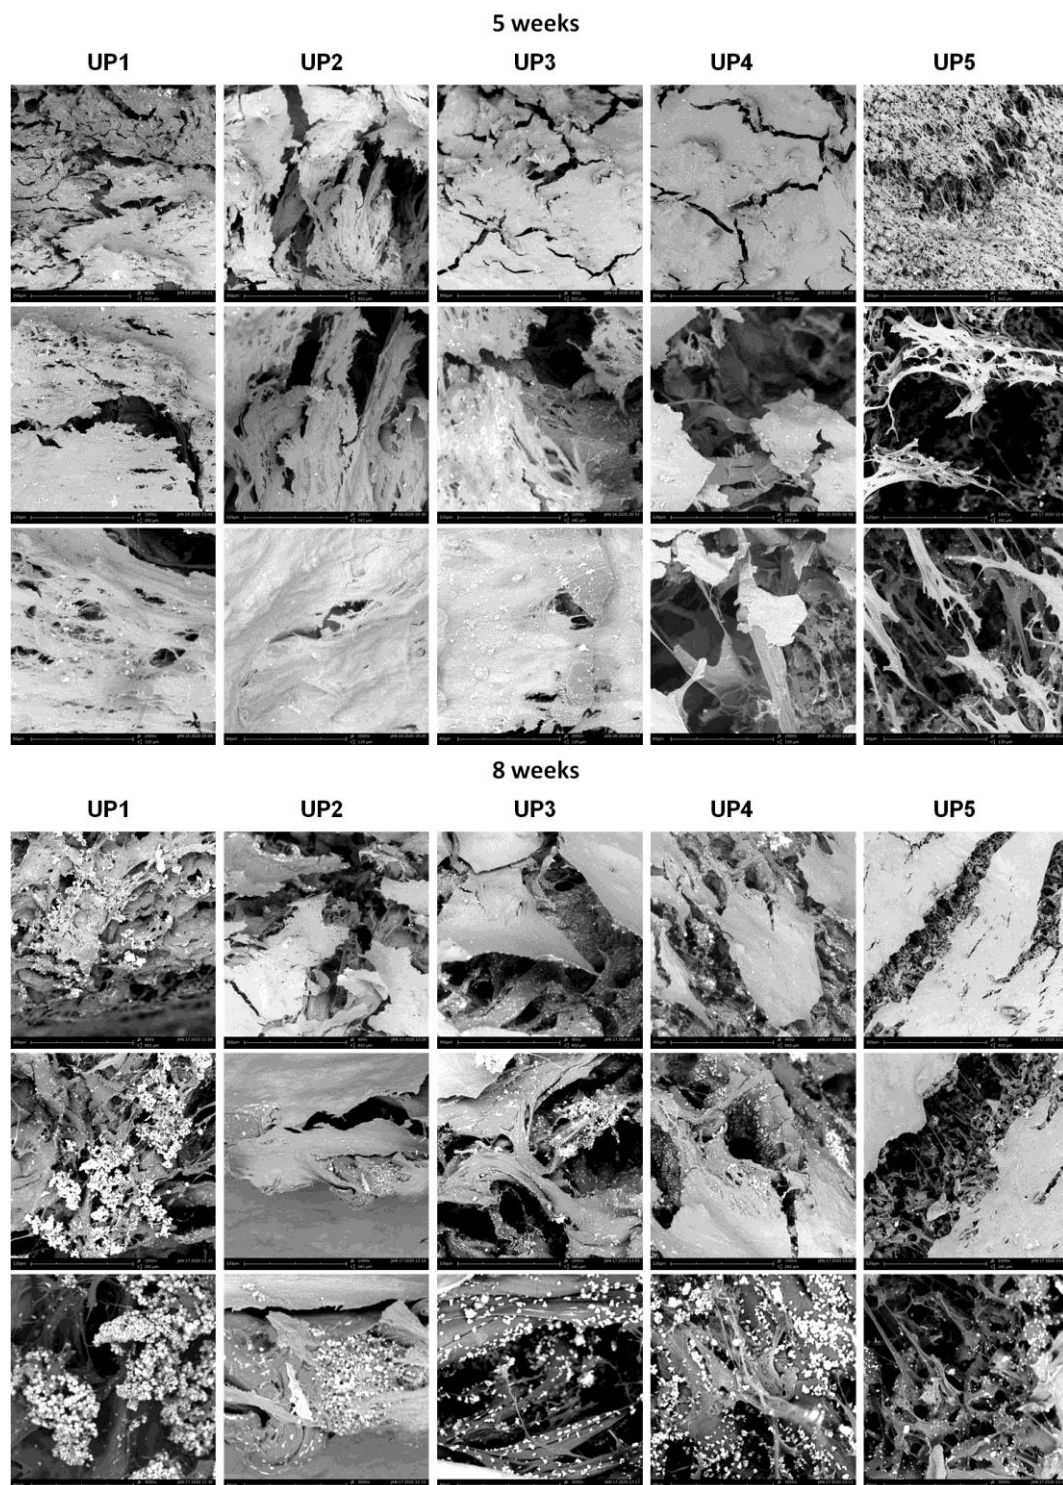

**Figure S2.** SEM images of UP scaffolds seeded with hADMSCs, depicting the adhesion and spreading of hADMSCs on the porous structure of the scaffolds after 1 week culture in MSC expansion medium and 2, 5 and 8 weeks culture in osteogenic differentiation medium.

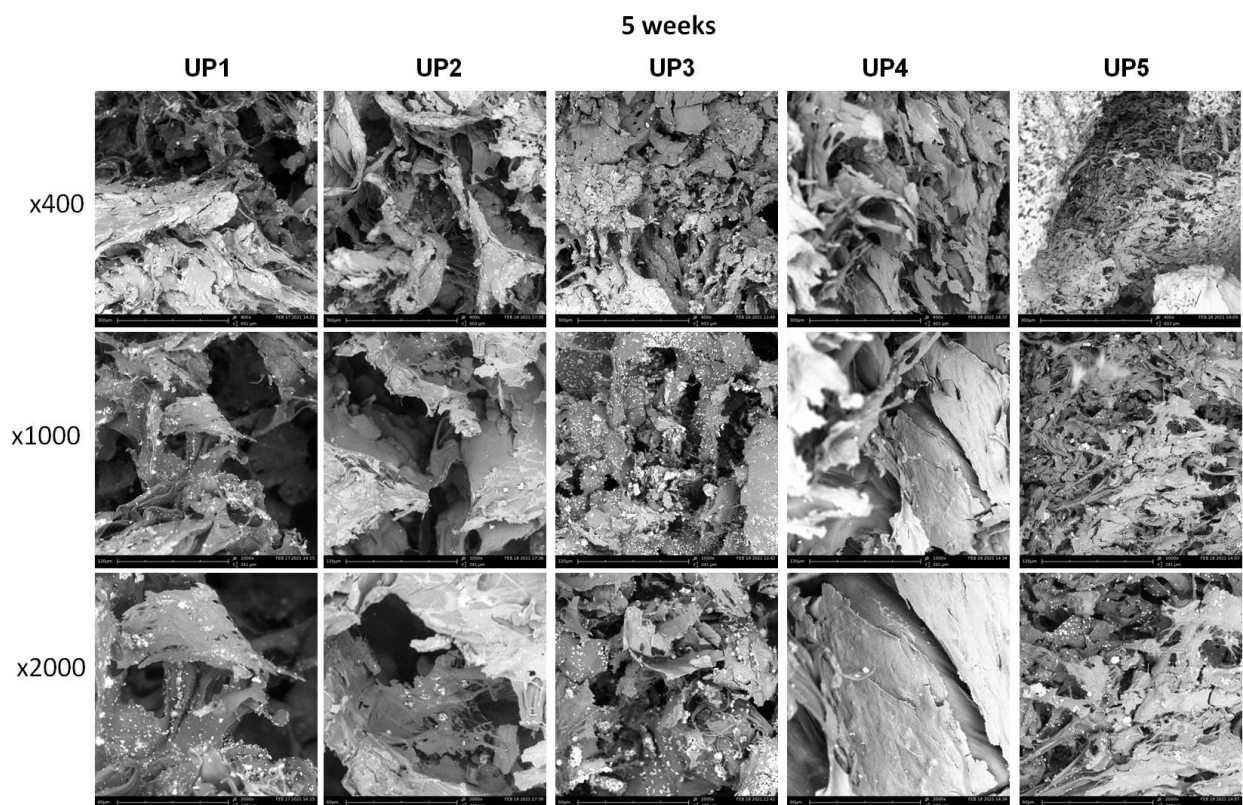

**Figure S3.** SEM images of cross-sections of the UP scaffolds seeded with hADMSCs, depicting the penetration of hADMSCs in the pores of the scaffolds after 5 weeks culture in osteogenic differentiation medium.
